# Supplementary material
Source: HighWire-hosted journal article supplement (https://www.ajnr.org/highwire/filestream/57669/field_highwire_adjunct_files/0/17-00619.pdf)
Supplement: 17-00619.pdf [file 17-00619.pdf]

**On-line Table 1: Characteristics of eligible studies**

| Study                         | Year | Country         | Age Range/Median (yr) | Male/Female | Primary Tumor                                                      | Radiotherapy Method            | Tracer                | Patients | Lesions           | Analytic Method Used | Study Design  | Follow-Up Time | Standard References                                | Cutoff Index*                                                                 |
|-------------------------------|------|-----------------|-----------------------|-------------|--------------------------------------------------------------------|--------------------------------|-----------------------|----------|-------------------|----------------------|---------------|----------------|----------------------------------------------------|-------------------------------------------------------------------------------|
| Béloháček et al <sup>22</sup> | 2003 | Czech Republic  | 36–76                 | 14:11       | RCC, NSCLC, BC, NC, CC, melanoma                                   | SRS                            | <sup>18</sup> F-FDG   | 25       | 57                | Lesions              | Prospective   | 26 wk/mean     | Histopathology + clinical and radiologic follow-up | U                                                                             |
| Ceccon et al <sup>8</sup>     | 2017 | Germany         | 17–78/55 (mean)       | 14:48       | NSCLC, BC, mixed cancer                                            | SRS, WBRT, EFRT, brachytherapy | <sup>18</sup> F-FET   | 62       | 76                | Lesions              | Retrospective | 16 mo/median   | Histopathology + clinical and radiologic follow-up | TBR <sub>mean</sub> > 1.95 + presence of TAC slope < 0.37 SUV/h               |
| Chao et al <sup>31</sup>      | 2001 | United States   | U                     | U           | LC, BC, RCC, HNC, EC, melanoma                                     | SRS                            | <sup>18</sup> F-FDG   | 36       | 36                | Lesions              | Retrospective | 5.6 mo/median  | Histopathology + radiologic follow-up              | U                                                                             |
| Cicone et al <sup>23</sup>    | 2015 | Italy           | 38–84/64              | 19:23       | LC, BC, RCC, GC, TC, CC, cervical cancer, melanoma, bladder cancer | SRS                            | <sup>18</sup> F-FDOPA | 42       | 50 (46 available) | Lesions              | Prospective   | 16 mo/median   | Histopathology + clinical and radiologic follow-up | SUV <sub>max</sub> /Bkg <sub>max</sub> (r-SUV)                                |
| Galdiks et al <sup>32</sup>   | 2012 | Germany         | 17–70/53 (mean)       | 5:26        | LC, BC, RCC, CC, SC, bone cancer                                   | SRS, WBRT                      | <sup>18</sup> F-FET   | 31       | 40                | Lesions              | Prospective   | 12 mo/median   | Histopathology + clinical and radiologic follow-up | TAC curve pattern II and III + TBR <sub>mean</sub> > 1.95                     |
| Guffens et al <sup>33</sup>   | 2015 | Belgium         | U                     | U           | BC, LC, HNC cancer                                                 | U                              | <sup>18</sup> F-FET   | 29       | 39                | Lesions              | Retrospective | U              | Histology + clinical follow-up                     | TAC curve pattern II and III vs curve pattern I                               |
| Hatzoglou et al <sup>34</sup> | 2016 | United States   | 24–81/63              | U           | NSCLC, BC, melanoma                                                | SRS, WBRT, PBRT                | <sup>18</sup> F-FDG   | 24       | 26                | Lesions              | Prospective   | 9 mo/median    | Histopathology + clinical and radiologic follow-up | SUV <sub>max</sub> lesion/SUV <sub>max</sub> normal brain ≥ 1.4               |
| Heesters et al <sup>24</sup>  | 2012 | The Netherlands | U                     | U           | U                                                                  | SRS                            | <sup>11</sup> C-MET   | 26       | U                 | Patients             | Retrospective | U              | Histopathology + clinical and radiologic follow-up | rSUV V20                                                                      |
| Horley et al <sup>35</sup>    | 2011 | United States   | 33–80/54              | 9:16        | NSCLC, BC, LC, RCC, GCC, melanoma, NHL, bladder cancer             | U                              | <sup>18</sup> F-FDG   | 25       | 27 (30 scans)     | Scans                | Retrospective | 18 mo/mean     | Histopathology + radiologic follow-up              | SUV <sub>max</sub> lesion/SUV <sub>max</sub> gray matter change with time (%) |
| Lai et al <sup>36</sup>       | 2015 | United States   | 46–79                 | 9:5         | LC, BC, RCC, melanoma, esophageal cancer                           | SRS                            | <sup>18</sup> F-FDG   | 14       | U                 | Patients             | Prospective   | U              | Histopathology                                     | SUV <sub>max</sub> > 3.0                                                      |
| Lizarraga et al <sup>37</sup> | 2014 | United States   | 21–77/58              | 6:26        | LC, BC, TC, CC, OC, melanoma, testis cancer                        | SRS, WBRT                      | <sup>18</sup> F-FDOPA | 32       | 83                | Lesions              | Retrospective | U              | Histopathology + clinical and radiologic follow-up | Visual scale                                                                  |
| Lohmann et al <sup>38</sup>   | 2017 | Germany         | 17–79                 | 11:36       | BC, EC, CC, OC, bronchial cancer                                   | SRS, WBRT                      | <sup>18</sup> F-FET   | 47       | 54                | Lesions              | Retrospective | 12 mo/median   | Histopathology + clinical and radiologic follow-up | TBR <sub>mean</sub> + TBR <sub>max</sub>                                      |
| Matuszak et al <sup>38</sup>  | 2016 | France          | 27–81/57              | 14:25       | BC, RCC, CC, bronchial cancer                                      | U                              | <sup>18</sup> F-FDG   | 39       | 49                | Lesions              | Retrospective | U              | Histopathology + clinical and radiologic follow-up | Visual scale (FDG 4 hr)                                                       |
| Romagna et al <sup>39</sup>   | 2016 | Germany         | 61.9                  | 11:11       | NSCLC, BC, RCC, GC, melanoma                                       | SRS, SBT                       | <sup>18</sup> F-FET   | 22       | 34 (50 scans)     | Scans                | Prospective   | 28.3 mo/median | Histopathology + clinical and radiologic follow-up | Decreasing TACs + TBR <sub>max</sub> > 2.15 + TBR <sub>mean</sub> > 1.95      |
| Terakawa et al <sup>40</sup>  | 2008 | Japan           | U                     | U           | LC, BC, CC, RCC, OC, testis cancer                                 | Conventional radiotherapy, SRS | <sup>11</sup> C-MET   | 51       | 56                | Lesions              | Retrospective | U              | Histopathology + clinical and radiologic follow-up | SUV <sub>max</sub> lesion/SUV <sub>mean</sub> normal brain > 1.41             |

**Note:**—U indicates unclear; RCC, renal cell carcinoma; NSCLC, non-small-cell lung cancer; BC, breast cancer; NC, nasopharyngeal cancer; CC, colorectal cancer; LC, lung cancer; HNC, head and neck cancer; EC, endometrial cancer; TC, thyroid cancer; GC, gastrointestinal cancer; SC, skin cancer; GCC, germ cell cancer; OC, ovarian cancer; NHL, non-Hodgkins lymphoma; WBRT, whole-brain radiation therapy; EFRT, external fractionated radiotherapy; PBRT, partial-brain radiation therapy; SBT, stereotactic iodine-125 brachytherapy; TBR, tumor-brain ratios; TAC, time-activity curve; SUV, standardized uptake value; SUV<sub>max</sub>, maximum lesion SUV; rSUV V20, the ratio of SUV V20 (the brain volume receiving ≥20 Gy)/SUV uninvolved brain; Bkg<sub>max</sub>, maximum background SUV.  
<sup>a</sup> TAC curve pattern (I, constantly increasing uptake; II, uptake peaking early [time-to-peak <20 min] followed by a plateau; III, uptake peaking early [time-to-peak <20 min] followed by a descent).

**On-line Table 2: Quality assessment (QUADAS-2)**

| Study                         | Risk of Bias      |            |                    |                 | Applicability Concerns |            |                    |
|-------------------------------|-------------------|------------|--------------------|-----------------|------------------------|------------|--------------------|
|                               | Patient Selection | Index Test | Reference Standard | Flow and Timing | Patient Selection      | Index Test | Reference Standard |
| Bělohávek et al <sup>22</sup> | L                 | L          | L                  | L               | L                      | L          | L                  |
| Ceccon et al <sup>8</sup>     | H                 | L          | L                  | H               | L                      | L          | L                  |
| Chao et al <sup>31</sup>      | H                 | L          | L                  | H               | L                      | L          | L                  |
| Cicone et al <sup>23</sup>    | L                 | H          | L                  | L               | L                      | L          | L                  |
| Galldiks et al <sup>32</sup>  | L                 | L          | L                  | L               | L                      | L          | L                  |
| Guffens et al <sup>33</sup>   | H                 | U          | L                  | L               | L                      | L          | L                  |
| Hatzoglou et al <sup>34</sup> | L                 | H          | L                  | L               | L                      | L          | L                  |
| Heesters et al <sup>24</sup>  | H                 | U          | L                  | L               | L                      | L          | L                  |
| Horky et al <sup>35</sup>     | H                 | H          | L                  | L               | H                      | L          | L                  |
| Lai et al <sup>36</sup>       | L                 | L          | H                  | L               | L                      | L          | L                  |
| Lizarraga et al <sup>37</sup> | H                 | L          | L                  | L               | L                      | L          | L                  |
| Lohmann et al <sup>13</sup>   | H                 | L          | L                  | L               | L                      | L          | L                  |
| Matuszak et al <sup>38</sup>  | H                 | L          | L                  | L               | L                      | L          | L                  |
| Romagna et al <sup>39</sup>   | L                 | H          | L                  | L               | L                      | L          | L                  |
| Terakawa et al <sup>40</sup>  | H                 | H          | L                  | L               | L                      | L          | L                  |

**Note:**—L indicates low risk; H, high risk; U, unclear.

**On-line Table 3: Meta-regression and subgroup analysis<sup>a</sup>**

| Covariate                                      | Number of Studies | Pooled Sensitivity | Pooled Specificity | Joint P Value |
|------------------------------------------------|-------------------|--------------------|--------------------|---------------|
| Study design                                   |                   |                    |                    |               |
| Prospective                                    | 6                 | 0.90 (0.83–0.96)   | 0.88 (0.83–0.94)   | .38           |
| Retrospective                                  | 9                 | 0.82 (0.77–0.88)   | 0.87 (0.82–0.93)   | .38           |
| Country                                        |                   |                    |                    |               |
| United States                                  | 5                 | 0.83 (0.73–0.92)   | 0.84 (0.76–0.92)   | .52           |
| Germany                                        | 4                 | 0.87 (0.80–0.95)   | 0.90 (0.84–0.96)   | .66           |
| Others                                         | 6                 | 0.84 (0.77–0.92)   | 0.89 (0.83–0.95)   | .91           |
| Radiotherapy methods                           |                   |                    |                    |               |
| SRS only                                       | 5                 | 0.84 (0.74–0.94)   | 0.90 (0.84–0.96)   | .76           |
| SRS + other methods                            | 7                 | 0.86 (0.78–0.91)   | 0.86 (0.80–0.91)   | .39           |
| Unclear                                        | 3                 | 0.85 (0.76–0.95)   | 0.94 (0.86–1.00)   | .49           |
| Tracer                                         |                   |                    |                    |               |
| <sup>11</sup> C-MET                            | 2                 | 0.86 (0.74–0.98)   | 0.79 (0.66–0.93)   | .31           |
| <sup>18</sup> F-FDOPA                          | 2                 | 0.86 (0.74–0.97)   | 0.88 (0.79–0.97)   | .99           |
| <sup>18</sup> F-FET                            | 5                 | 0.83 (0.76–0.91)   | 0.89 (0.83–0.95)   | .77           |
| <sup>18</sup> F-FDG                            | 6                 | 0.85 (0.77–0.94)   | 0.90 (0.83–0.96)   | .81           |
| Cutoff index                                   |                   |                    |                    |               |
| Quantitative methods without TAC curve pattern | 7                 | 0.86 (0.79–0.93)   | 0.86 (0.80–0.93)   | .70           |
| Quantitative methods with TAC curve pattern    | 4                 | 0.84 (0.76–0.93)   | 0.88 (0.81–0.96)   | .98           |
| Visual scale                                   | 2                 | 0.88 (0.78–0.97)   | 0.88 (0.79–0.97)   | .83           |
| Unclear                                        | 2                 | 0.74 (0.55–0.92)   | 0.90 (0.82–0.98)   | .26           |
| Method of quantification                       |                   |                    |                    |               |
| Lesions                                        | 11                | 0.82 (0.77–0.87)   | 0.88 (0.84–0.92)   | .07           |
| Patients                                       | 2                 | 0.91 (0.78–1.00)   | 0.84 (0.65–1.00)   | .60           |
| Scans                                          | 2                 | 0.95 (0.88–1.00)   | 0.88 (0.77–0.99)   | .11           |
| Sample size                                    | 15                | 0.85 (0.79–0.89)   | 0.88 (0.83–0.91)   | .81           |
| Median age                                     | 6                 | 0.89 (0.81–0.94)   | 0.87 (0.80–0.92)   | .67           |
| Male percentage                                | 10                | 0.97 (0.48–1.00)   | 0.91 (0.44–0.99)   | .69           |

**Note:**—TAC indicates time-activity curve.

<sup>a</sup> Data in parentheses are 95% CIs.

**On-line Table 4: Sensitivity analysis**

| Excluding Studies                                            | Pooled Sensitivity (95% CI) | Comparison with Overall (P Value) <sup>a</sup> | Pooled Specificity (95% CI) | Comparison with Overall (P Value) <sup>a</sup> |
|--------------------------------------------------------------|-----------------------------|------------------------------------------------|-----------------------------|------------------------------------------------|
| Overall                                                      | 0.85 (0.79–0.89)            | –                                              | 0.88 (0.83–0.91)            | –                                              |
| Bělohávek et al <sup>22</sup>                                | 0.85 (0.79–0.90)            | >.05                                           | 0.87 (0.82–0.91)            | >.05                                           |
| Ceccon et al <sup>8</sup>                                    | 0.85 (0.79–0.90)            | >.05                                           | 0.87 (0.82–0.91)            | >.05                                           |
| Chao et al <sup>31</sup>                                     | 0.86 (0.80–0.90)            | >.05                                           | 0.88 (0.84–0.92)            | >.05                                           |
| Cicone et al <sup>23</sup>                                   | 0.84 (0.79–0.89)            | >.05                                           | 0.87 (0.83–0.91)            | >.05                                           |
| Galldiks et al <sup>32</sup>                                 | 0.84 (0.78–0.88)            | >.05                                           | 0.88 (0.83–0.91)            | >.05                                           |
| Guffens et al <sup>33</sup>                                  | 0.86 (0.81–0.90)            | >.05                                           | 0.88 (0.83–0.92)            | >.05                                           |
| Hatzoglou et al <sup>34</sup>                                | 0.85 (0.79–0.89)            | >.05                                           | 0.88 (0.84–0.92)            | >.05                                           |
| Heesters et al <sup>24</sup>                                 | 0.84 (0.78–0.89)            | >.05                                           | 0.88 (0.83–0.91)            | >.05                                           |
| Horky et al <sup>35</sup>                                    | 0.84 (0.78–0.88)            | >.05                                           | 0.87 (0.83–0.91)            | >.05                                           |
| Lai et al <sup>36</sup>                                      | 0.85 (0.79–0.89)            | >.05                                           | 0.88 (0.84–0.92)            | >.05                                           |
| Lizarraga et al <sup>37</sup>                                | 0.85 (0.79–0.90)            | >.05                                           | 0.88 (0.83–0.92)            | >.05                                           |
| Lohmann et al <sup>13</sup>                                  | 0.85 (0.79–0.90)            | >.05                                           | 0.88 (0.83–0.91)            | >.05                                           |
| Matuszak et al <sup>138</sup>                                | 0.84 (0.78–0.88)            | >.05                                           | 0.87 (0.83–0.91)            | >.05                                           |
| Romagna et al <sup>139</sup>                                 | 0.84 (0.78–0.89)            | >.05                                           | 0.88 (0.83–0.92)            | >.05                                           |
| Terakawa et al <sup>40</sup>                                 | 0.85 (0.79–0.90)            | >.05                                           | 0.89 (0.85–0.92)            | >.05                                           |
| Guffens et al <sup>33</sup> and Heesters et al <sup>24</sup> | 0.85 (0.80–0.89)            | >.05                                           | 0.88 (0.83–0.92)            | >.05                                           |

**Note:**— indicates not applicable.

<sup>a</sup> P < .05 was considered statistically significant.
